# Supplementary material for: Conversion of grape pomace into fungal biomass: a study of Pleurotus cultivation for a sustainable agro-residue management
Source: Springer Nature journal article supplement (doi:10.1186/s40538-025-00739-5), 2025-02-17
Supplement: MOESM1 [file 40538_2025_739_MOESM1_ESM.docx]

| Substrate and Ratio | Code | Fresh weight (g) | Dry Weight (g) |
| --- | --- | --- | --- |
| Grape Pomace (100%) | GP | 600 | 300 |
| Corn Digestate (100%) | CD | 400 | 200 |
| Wheat Straw (100%) | WS | 210 | 50 |
| Grape Pomace Wheat Straw (50%-50%) | GP-WS | 405 | 175 |
| Grape Pomace Corn Digestate  (50%-50%) | GP-CD | 500 | 250 |

Table S1. Fresh and dry weight of the experimental substrates.

Figure S2. Cultivation timeline of the three *Pleurotus* species on different experimental substrates. Green line: days between incubation and bags complete colonization; orange line: days between the complete colonization and the formation of mushroom primordia; red line: days between primordia formation and first mushroom harvest.
